# Supplementary material
Source: publisher site journal article supplement (https://www.spandidos-publications.com/2624/downloadSupplementary)
Supplement: Supplementary file 1 [file downloadSupplementary]

Figure S1. Immunohistochemistry for the specificity of anti-PALB2 antibodies. Surgical samples from stomach (upper panels) and breast cancer (lower panels) were analyzed by immunohistochemistry (magnification, x400; n=3 patients per group).

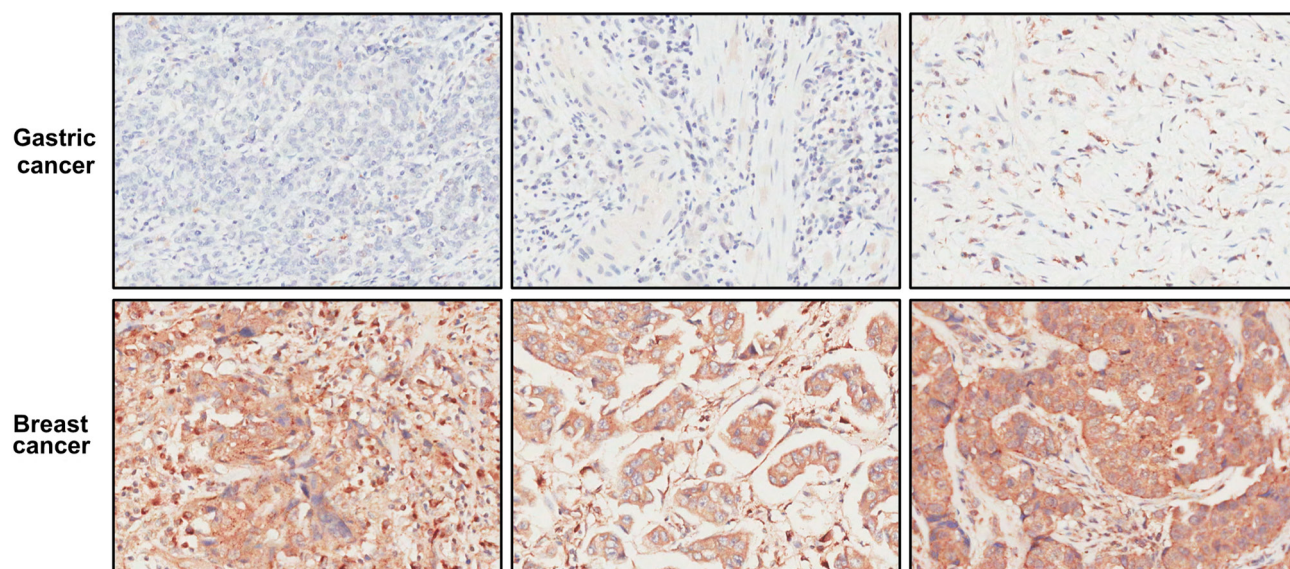

Figure S2. Inhibition of PALB2 expression in pancreatic ductal adenocarcinoma cells. (A) Reverse transcription-quantitative PCR indicated successful PALB2-knockdown by siRNA in PANC1 and CFPAC1 cell lines. (B) Migration analysis of cells following PALB2-knockdown as determined by a wound healing assay (magnification, x100). (C) Cell proliferation rates were not affected by PALB2-knockdown in PANC1 cells. (D) PALB2-knockdown suppressed cell proliferation in CFPAC1 cells. Biological triplicates were analyzed using an unpaired Student's t-test. \* $P < 0.05$ ; \*\*\* $P < 0.001$ . OD, optical density; NC, negative control; siRNA, small interfering RNA; PALB2, partner and localizer of BRCA2.

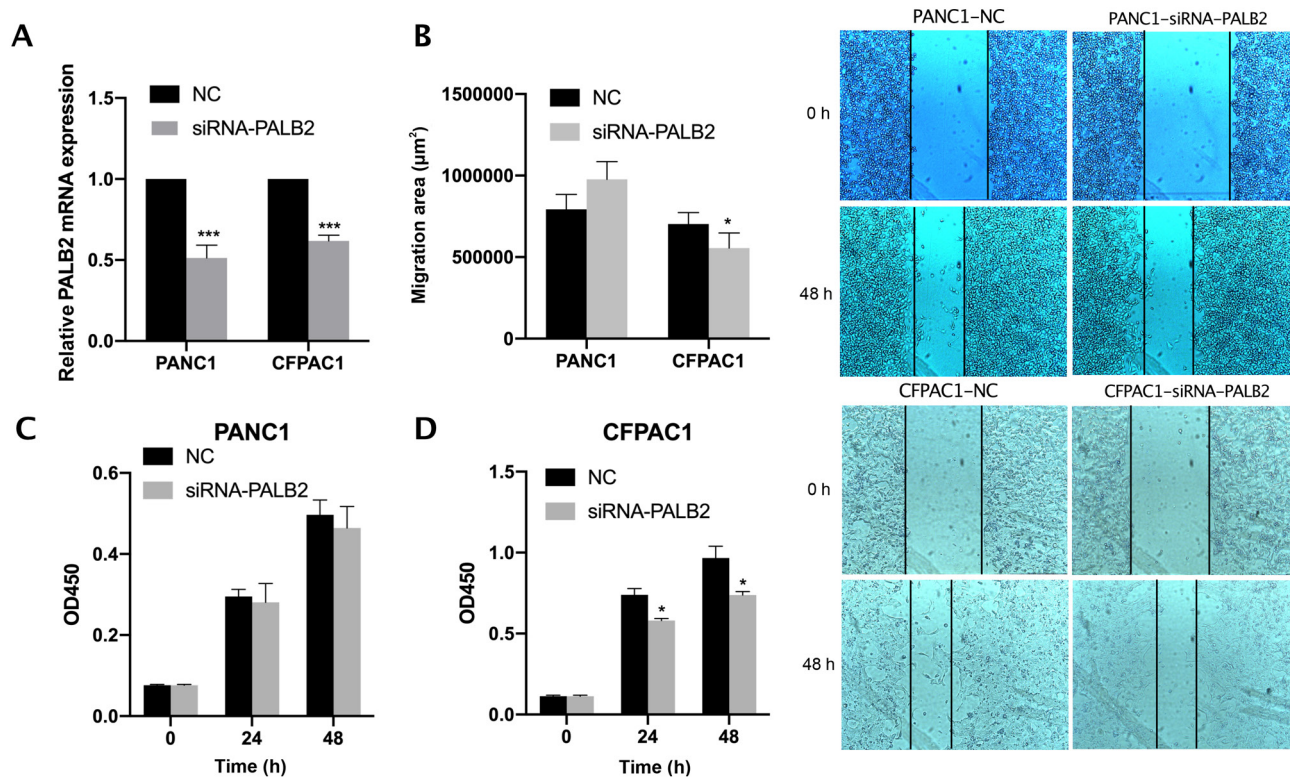

Table SI. Distribution of the IHC scores among PDAC (n=157) and peritumoral tissues (n=121).

| IHC score | PDAC tissues, n (%) | Peritumor tissues, n (%) |
|-----------|---------------------|--------------------------|
| 0         | 93 (59.2)           | 91 (75.2)                |
| 1         | 26 (16.6)           | 27 (22.3)                |
| 2         | 22 (14.0)           | 2 (1.7)                  |
| 3         | 7 (4.5)             | 0 (0.0)                  |
| 4         | 9 (5.7)             | 1 (0.8)                  |

IHC, immunohistochemistry; PDAC, pancreatic ductal adenocarcinoma.

Table SII. Clinicopathological characteristics of 178 patients with PDAC and PALB2 expression in PDAC samples represented in The Cancer Genome Atlas database (May 2019).

| Features                         | High PALB2 expression, n=89 | Low PALB2 expression, n=89 | P-value             |
|----------------------------------|-----------------------------|----------------------------|---------------------|
| Mean age $\pm$ SD, years         | 65.8 $\pm$ 11.0             | 63.4 $\pm$ 10.8            | 0.1393              |
| Sex, n (%)                       |                             |                            | 0.4513              |
| Male                             | 46 (51.7)                   | 52 (58.4)                  |                     |
| Female                           | 43 (48.3)                   | 37 (41.6)                  |                     |
| TNM staging, n <sup>a</sup> (%)  |                             |                            | 0.0099 <sup>b</sup> |
| T1-2                             | 9 (10.0)                    | 22 (25.0)                  |                     |
| T3-4                             | 79 (90.0)                   | 66 (75.0)                  |                     |
| N stage, n <sup>a</sup> (%)      |                             |                            | 0.8661              |
| N0                               | 24 (27.2)                   | 27 (39.7)                  |                     |
| N1                               | 64 (63.8)                   | 61 (60.3)                  |                     |
| AJCC staging, n <sup>a</sup> (%) |                             |                            | 0.6151              |
| I-IIA                            | 23 (26.1)                   | 26 (29.5)                  |                     |
| IIB-IV                           | 65 (73.9)                   | 62 (70.5)                  |                     |
| Tumor location, n (%)            |                             |                            | >0.9999             |
| Head                             | 69 (77.5)                   | 70 (78.6)                  |                     |
| Body/Tail                        | 20 (22.5)                   | 19 (21.4)                  |                     |

<sup>a</sup>n=176. <sup>b</sup>P<0.05. PDAC, pancreatic ductal adenocarcinoma; PALB2, partner and localizer of BRCA2.
